# Supplementary material for: Genetic and Physiological Characterization of Soybean-Nodule-Derived Isolates from Bangladeshi Soils Revealed Diverse Array of Bacteria with Potential Bradyrhizobia for Biofertilizers
Source: MDPI journal article supplement (doi:10.3390/microorganisms10112282), 2022-11-17
Supplement: s1 [file s1]

**Table S1. Information of primers used in this study.**

| Name       | Primer sequences 5'-3'     | Reference  |
|------------|----------------------------|------------|
| 1-F        | AGTTTGATCCTGGCTC           | [23]       |
| 3-R        | AAGGAGGTGATCCAGCC          |            |
| ITS 450    | TGYSCACACCGCCCGT           | [24]       |
| ITS 1440   | CACGTGTYCCGCCBTACT         |            |
| F11        | CGGAATCAGGCTAAAGCCCTGCACAA | [25]       |
| R11        | GGTTCGCGAGGCCCTGCTGCACAT   |            |
| Nif H-I    | AGCATGTCYTCSAGYTCNTCCA     | [26]       |
| Nif H-F    | TACGGNAARGGSGGNATCGGCAA    |            |
| gyrB343F   | TTCGACCAGAAATCCTAYAAGG     | [27]       |
| gyrB1043R  | AGCTTGTCCCTTSGTCTGCG       |            |
| atpD-20F   | AGCTTCTTGCCCTTCTCGAC       | This study |
| atpD-1174R | CCGCATCATCAACGTCATC        | This study |
| glnII-9R   | ACGGACGAGATCGTCTTCAG       | This study |
| glnII-12F  | YAAGCTCGAGTACATYTGGCT      | [28]       |

**Table S2 Basic information of soybean varieties used in this study.**

|              | <i>Glycine max</i> cv. Enrei                                                        | <i>Glycine max</i> cv. Binasoybean-3                                                 |
|--------------|-------------------------------------------------------------------------------------|--------------------------------------------------------------------------------------|
| Country      | Japan                                                                               | Bangladesh                                                                           |
| Release year | 1971                                                                                | 2013                                                                                 |
| Weight       | ~0.330 gram                                                                         | ~0.085 gram                                                                          |
| Diameter     | ~10 mm                                                                              | ~5 mm                                                                                |
| Picture      |  |  |

**Table S3 List of selected *Bradyrhizobium* isolates for pot experiments and further characterization.**

| Location   | Total Isolated bacteria | 16S rRNA gene similarity with known Species | Number of isolates | Number of elected isolates | Selected isolate name | Isolate name (short form) |
|------------|-------------------------|---------------------------------------------|--------------------|----------------------------|-----------------------|---------------------------|
| Bhola      | 13                      | <i>B. liaoningense</i>                      | 12                 | 1                          | Bho-P2-B2-S1-51       | 51                        |
|            |                         | <i>Pandoraea sputorum</i>                   | 1                  |                            |                       |                           |
| Bogra      | 1                       | <i>B. elkanii</i>                           | 1                  | 1                          | Bog-P3-B1-S1-29       | 29                        |
| Dinajpur   | 13                      | <i>B. diazoefficiens</i>                    | 7                  | 1                          | Din-P2-M1-M1-25       | 25                        |
|            |                         | <i>Methylobacterium tardum</i>              | 2                  |                            |                       |                           |
|            |                         | <i>Pandoraea sputorum</i>                   | 3                  |                            |                       |                           |
|            |                         | <i>Stenotrophomonas maltophilia</i>         | 1                  |                            |                       |                           |
| Lakshmipur | 5                       | <i>B. elkanii</i>                           | 3                  | 1                          | Lax-P1-S1-M1-46       | 46                        |
|            |                         | <i>B. liaoningense</i>                      | 1                  | 1                          | Lax-P1-M1-S1-85       | 85                        |
|            |                         | <i>Bacillus pumilus</i>                     | 1                  |                            |                       |                           |
| Mymensingh | 6                       | <i>B. diazoefficiens</i>                    | 6                  | 2                          | Mym-P3-M2-S1-40       | 40                        |
|            |                         |                                             |                    |                            | Mym-P2-M3-S1-45       | 45                        |
| Natore     | 12                      | <i>B. diazoefficiens</i>                    | 11                 | 1                          | Nat-P3-M1-S1-79       | 79                        |
|            |                         | <i>Leifsonia shinshuensis</i>               | 1                  |                            |                       |                           |
| Nilphamary | 5                       | <i>B. diazoefficiens</i>                    | 5                  | 1                          | Nil-P2-B1-M1-36       | 36                        |
| Noakhali   | 6                       | <i>B. diazoefficiens</i>                    | 6                  | 1                          | Noa-P1-B1-M1-31       | 31                        |
| Panchagarh | 3                       | <i>B. liaoningense</i>                      | 1                  | 1                          | Pan-P1-B1-S1-69       | 69                        |
|            |                         | <i>Bacillus pumilus</i>                     | 2                  |                            |                       |                           |
| Tangail    | 4                       | <i>B. yuanmingense</i>                      | 2                  | 1                          | Tan-P1-B2-S1N-84      | 84                        |
|            |                         | <i>Pandoraea sputorum</i>                   | 1                  |                            |                       |                           |
|            |                         | <i>Stenotrophomonas maltophilia</i>         | 1                  |                            |                       |                           |
| Thakurgaon | 16                      | <i>B. diazoefficiens</i>                    | 10                 | 1                          | Tha-P2-B1-S1-68       | 68                        |
|            |                         | <i>Methylobacterium radiotolerans</i>       | 4                  |                            |                       |                           |
|            |                         | <i>Pandoraea sputorum</i>                   | 2                  |                            |                       |                           |

a)

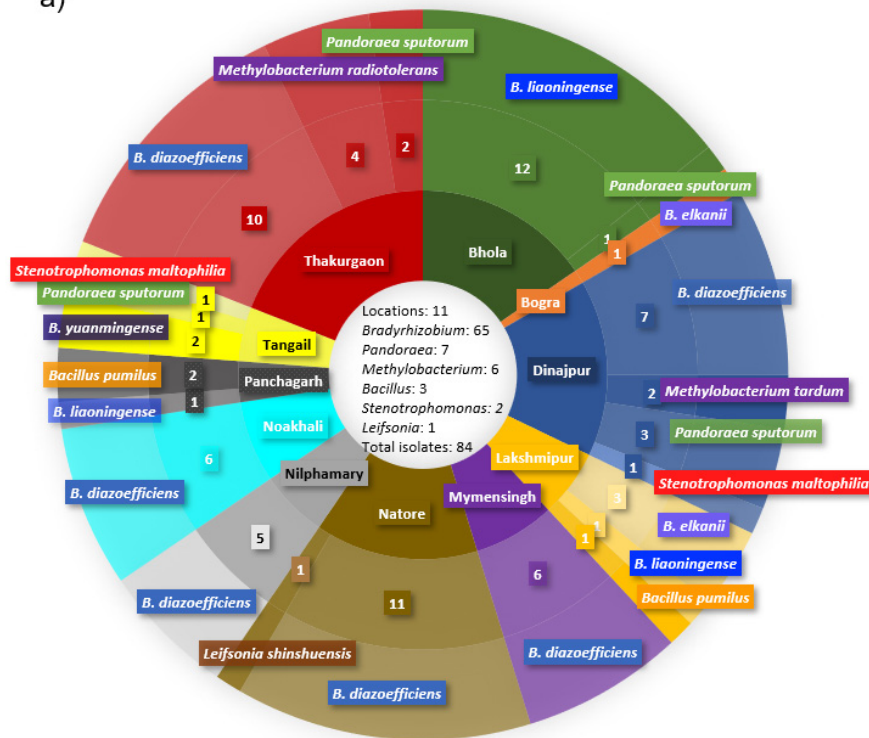

b)

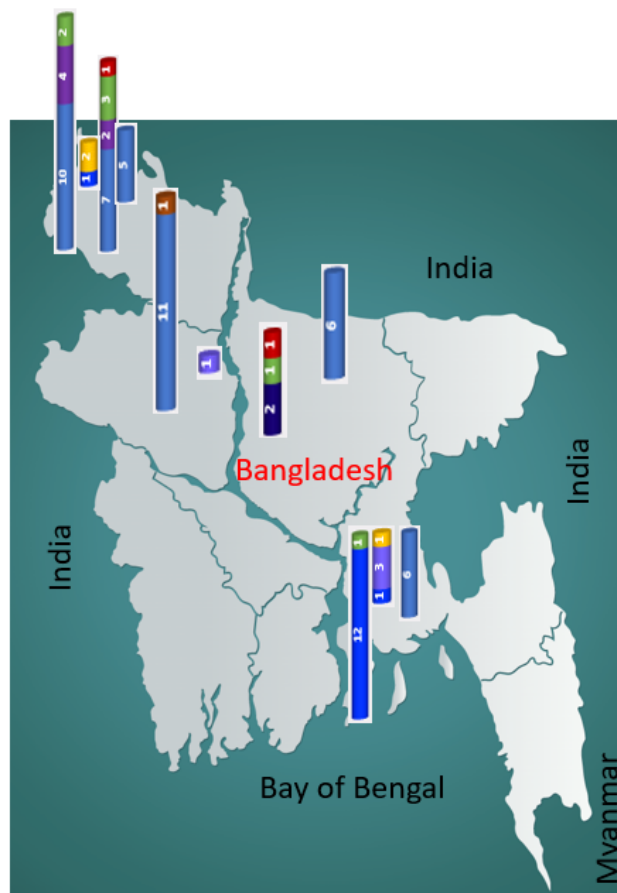

**Figure S1. Doughnut graph a) and map of Bangladesh b) showing distribution of different types of bacteria. Colors of the bars in b) are the same as a) showing bacterial species.**

| Variety            | Enrei                                                                             | BINA                                                                               | Enrei                                                                               | BINA                                                                                | Enrei                                                                               | BINA                                                                                |
|--------------------|-----------------------------------------------------------------------------------|-----------------------------------------------------------------------------------|-----------------------------------------------------------------------------------|-----------------------------------------------------------------------------------|-----------------------------------------------------------------------------------|-----------------------------------------------------------------------------------|-----------------------------------------------------------------------------------|-----------------------------------------------------------------------------------|-----------------------------------------------------------------------------------|------------------------------------------------------------------------------------|-------------------------------------------------------------------------------------|-------------------------------------------------------------------------------------|-------------------------------------------------------------------------------------|-------------------------------------------------------------------------------------|
| Nodule photo       | 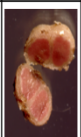 |  |  |  |  |  |  |  |  |  |  |  |  |  |
| Nodule number      | 19±7.810                                                                          | 24±4.359                                                                          | 5±2.646                                                                           | 20±3.606                                                                          | 14±3.606                                                                          | 28±7.550                                                                          | 20.333±1.528                                                                      | 25.333±10.786                                                                     | 18±9.539                                                                          | 20.667±4.933                                                                       | 15.333±4.041                                                                        | 14±2.000                                                                            | 14±2.646                                                                            | 14±2.646                                                                            |
| Isolate            | USDA110                                                                           |                                                                                   | Noa-P1-B1-M1-31                                                                   |                                                                                   | Tha-P2-B1-S1-68                                                                   |                                                                                   | Din-P2-M1-M1-25                                                                   |                                                                                   | Bho-P2-B2-S1-51                                                                   |                                                                                    | Lax-P1-M1-S1-85                                                                     |                                                                                     | Pan-P1-B1-S1-69                                                                     |                                                                                     |
| Genetic similarity | <i>B. diazoefficiens</i>                                                          |                                                                                   | <i>B. diazoefficiens</i>                                                          |                                                                                   | <i>B. diazoefficiens</i>                                                          |                                                                                   | <i>B. diazoefficiens</i>                                                          |                                                                                   | <i>B. liaoningense</i>                                                            |                                                                                    | <i>B. liaoningense</i>                                                              |                                                                                     | <i>B. liaoningense</i>                                                              |                                                                                     |
| Nodule photo       |  |  |  |  |  |  |  |  | NO Nodule                                                                         |  |  |  |  |  |
| Nodule number      | 15.667±2.082                                                                      | 18.667±2.517                                                                      | 10.667±1.528                                                                      | 23.667±5.033                                                                      | 21.333±14.048                                                                     | 22.333±0.577                                                                      | 19.333±2.082                                                                      | 25.333±0.577                                                                      | 13±2.646                                                                          | 18±1.000                                                                           | 21.667±3.055                                                                        | 14.667±3.215                                                                        | 7.667±7.638                                                                         | 23.333±8.505                                                                        |
| Isolate            | Nil-P2-B1-M1-36                                                                   |                                                                                   | Mym-P3-M2-S1-40                                                                   |                                                                                   | Mym-P2-M3-S1-45                                                                   |                                                                                   | Nat-P3-M1-S1-79                                                                   |                                                                                   | Tan-P1-B2-S1N-84                                                                  |                                                                                    | Lax-P1-S1-M1-46                                                                     |                                                                                     | Bog-P3-B1-S1-29                                                                     |                                                                                     |
| Genetic similarity | <i>B. diazoefficiens</i>                                                          |                                                                                   | <i>B. diazoefficiens</i>                                                          |                                                                                   | <i>B. diazoefficiens</i>                                                          |                                                                                   | <i>B. diazoefficiens</i>                                                          |                                                                                   | <i>B. yuanmingense</i>                                                            |                                                                                    | <i>B. elkanii</i>                                                                   |                                                                                     | <i>B. elkanii</i>                                                                   |                                                                                     |

**Figure S2. Pictures of dissected nodules of soybean Enrei variety and Binasoybean-3 variety inoculated with selected isolates and *B. diazoefficiens* USDA110.**

a)

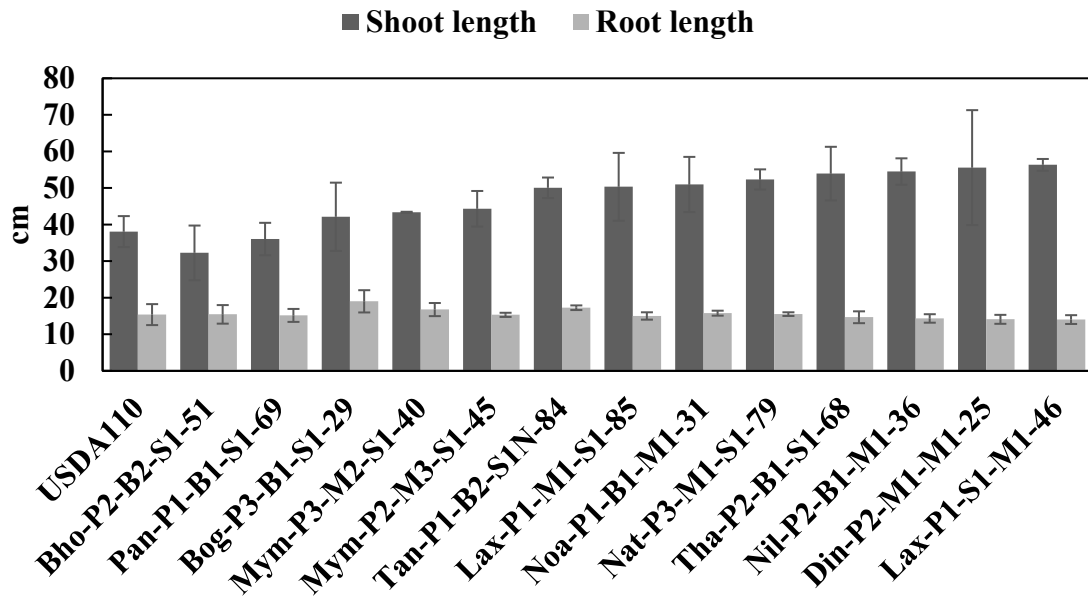

b)

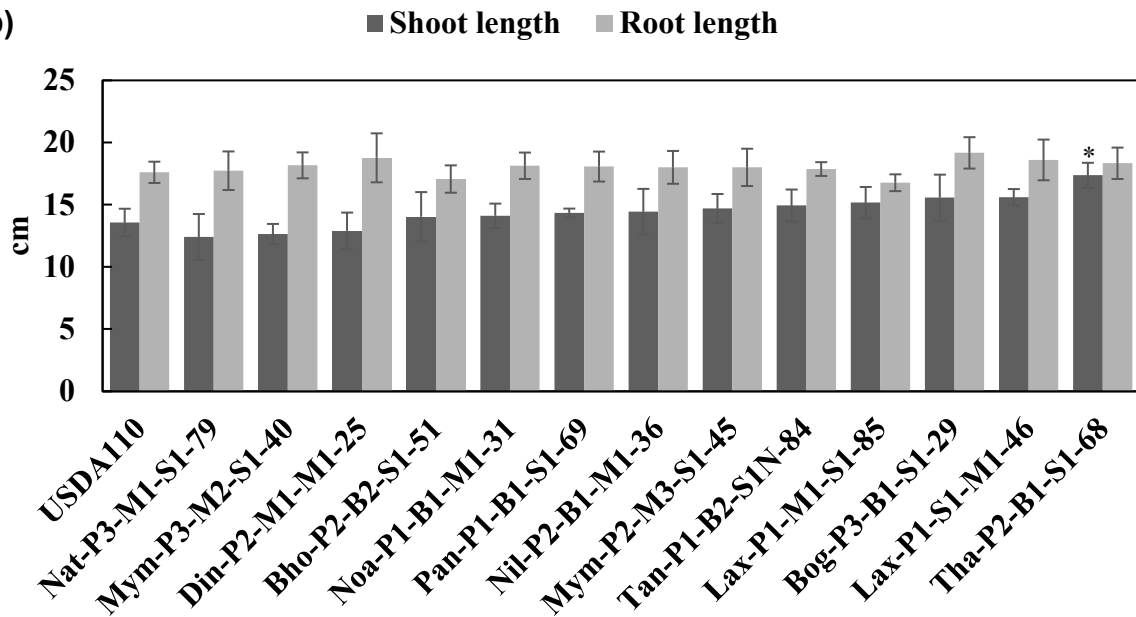

**Figure S3. Shoot and root length of soybean Enrei variety a) and Binasoybean-3 variety b) inoculated with selected isolates and *B. diazoefficiens* USDA110. Data are presented in average value with error bar denotes STDEV of three plants each. “\*” Denotes significance with “*B. diazoefficiens* USDA110” at 95% confidence level using Dunnett’s test.**

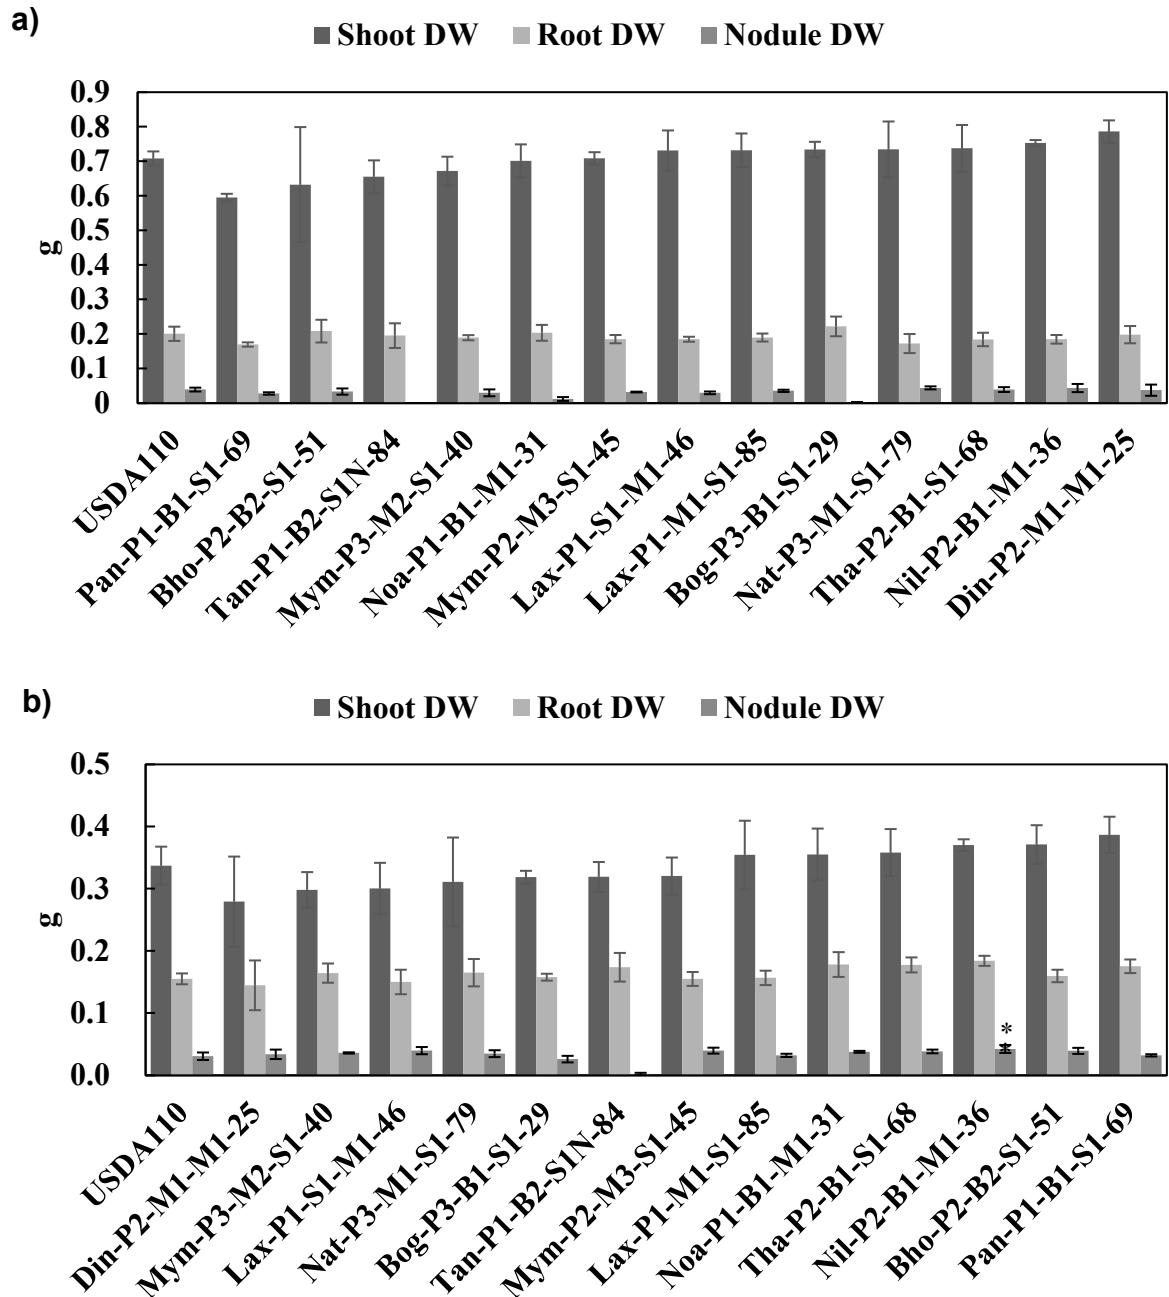

Figure S4. Shoot dry weight (DW), root DW and nodule DW of soybean Enrei variety (a) and Binasoybean-3 variety (b) inoculated with isolates and *B. diazoefficiens* USDA110. Data are presented in average value with error bar denotes STDEV of three plants each. “\*” Denotes significance with “*B. diazoefficiens* USDA110” at 95% confidence level using Dunnett’s test.
